# Supplementary material for: Association between county jail incarceration and cause-specific county mortality in the USA, 1987–2017: a retrospective, longitudinal study
Source: PubMed Central journal article supplement — Lancet Public Health. Author manuscript; Available in PMC 2021 Apr 19. (PMC8054445; doi:10.1016/s2468-2667(20)30283-8), 2021-02-23
Supplement: NIHMS1687810-supplement-1.pdf [file NIHMS1687810-supplement-1.pdf]

# THE LANCET

## Public Health

### Supplementary appendix

This appendix formed part of the original submission and has been peer reviewed. We post it as supplied by the authors.

Supplement to: Kajeepeta S, Mauro PM, Keyes KM, El-Sayed AM, Rutherford CG, Seth J Prins. Association between county jail incarceration and cause-specific county mortality in the USA, 1987–2017: a retrospective, longitudinal study. *Lancet Public Health* 2021; published online Feb 23. [http://dx.doi.org/10.1016/S2468-2667\(20\)30283-8](http://dx.doi.org/10.1016/S2468-2667(20)30283-8).

Supplementary Table S1. International Classification of Diseases (ICD) codes for nine causes of death of interest

| <b>Cause of death</b>             | <b>ICD-9 (1988-1998)</b>                                                                                                                        | <b>ICD-10 (1999-2017)</b>                                                                                                                                                                                                                                                                                                 |
|-----------------------------------|-------------------------------------------------------------------------------------------------------------------------------------------------|---------------------------------------------------------------------------------------------------------------------------------------------------------------------------------------------------------------------------------------------------------------------------------------------------------------------------|
| Cerebrovascular disease           | GR72-440-470                                                                                                                                    | I60-I69                                                                                                                                                                                                                                                                                                                   |
| Chronic lower respiratory disease | GR72-550-580                                                                                                                                    | J40-J47                                                                                                                                                                                                                                                                                                                   |
| Diabetes                          | GR-72-260                                                                                                                                       | E10-E14                                                                                                                                                                                                                                                                                                                   |
| Substance-induced                 | 291, 292, 303, 304, 305, 357·5, 357·6, 425·5, 535·3, 571·0-571·3, 760·7, 790·3, E850-E858, E860·0, E860·1, E950·0-E950·5, E962·0, E980·0-E980·5 | D59·0, D59·2, D61·1, D64·2, E16·0, E23·1, E24·2, E27·3, E66·1, F10-F19, G21·1, G24·0, G25·4, G25·6, G31·2, G62·0, G62·1, G72·0, G72·1, I42·6, I95·2, J70·3, J70·4, K29·2, K70, K85·2, K85·3, K86·0, L10·5, L27·0, L27·1, M32·0, M80·4, M81·4, M87·1, P04·2-P04·4, P96·1, Q86, R78·0-R78·5, X40-X45, X60-X65, X85, Y10-Y15 |
| Heart disease                     | GR72-320-410                                                                                                                                    | I00-I09, I11, I13, I120-I151                                                                                                                                                                                                                                                                                              |
| Infectious disease                | 001-139, 320-326, 390-392, 460-466, 480-487, 540, 680-686, 771                                                                                  | A00-B99, G00-G09, I00-I02, J00-J06, J09-J18, J20-J22, K35, L00-L08, P35-P39                                                                                                                                                                                                                                               |
| Malignant neoplasm                | GR72-160-240                                                                                                                                    | C00-C97                                                                                                                                                                                                                                                                                                                   |
| Suicide                           | GR72-820                                                                                                                                        | U03, X60-X84, Y87·0                                                                                                                                                                                                                                                                                                       |
| Unintentional injury              | CDC WONDER Injury Intent and Mechanism grouping                                                                                                 | V01-X59, Y85-Y86                                                                                                                                                                                                                                                                                                          |

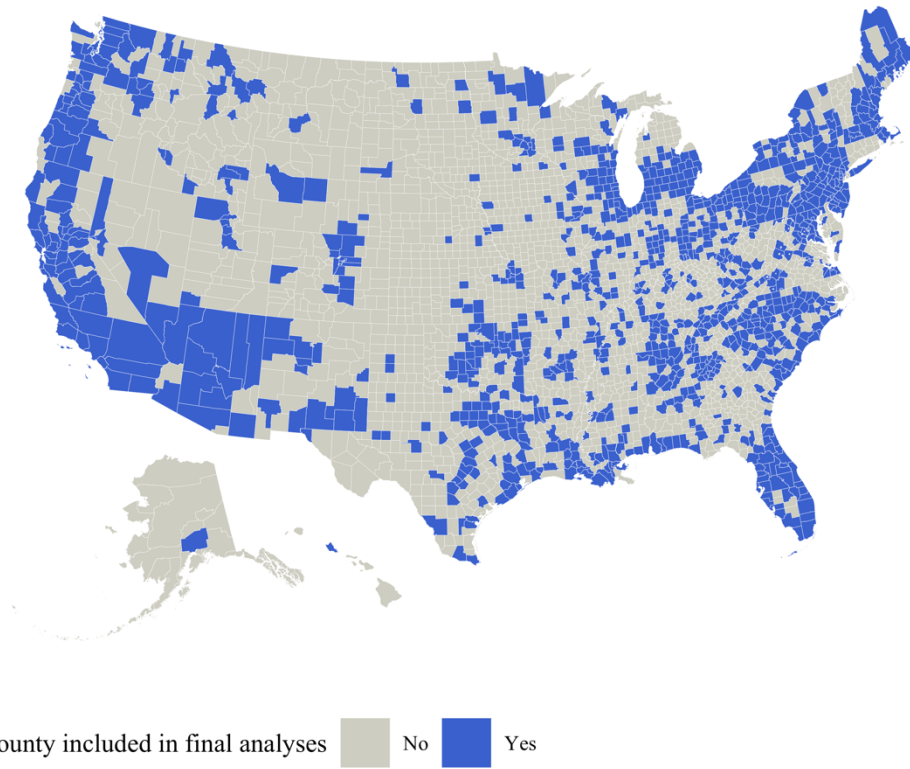

Supplementary Figure S1. Map of 1,094 distinct counties included in final analyses

Supplementary Table S2. Sensitivity analyses of within-county associations between a one-unit change in county jail incarceration rate (1 per 1,000) and change in county mortality rates for nine common causes of death with one-year lag

|                                   | <b>Change in county jail incarceration rate (1 per 1,000)</b> |                                                    |                                                    |                                   |
|-----------------------------------|---------------------------------------------------------------|----------------------------------------------------|----------------------------------------------------|-----------------------------------|
|                                   | <b>Final analysis</b>                                         | <b>Analysis replacing suppressed counts with 0</b> | <b>Analysis replacing suppressed counts with 9</b> | <b>Random intercepts analysis</b> |
|                                   | <i>RR<sup>a</sup> (95% CI<sup>b</sup>)</i>                    | <i>RR (95% CI)</i>                                 | <i>RR (95% CI)</i>                                 | <i>RR (95% CI)</i>                |
| <b>Cause of death outcomes</b>    |                                                               |                                                    |                                                    |                                   |
| Infectious disease                | 1·065 (1·061, 1·070)                                          | 1·078 (1·072, 1·084)                               | 1·065 (1·061, 1·069)                               | 1·066 (1·064, 1·069)              |
| Chronic lower respiratory disease | 1·049 (1·045, 1·052)                                          | 1·062 (1·057, 1·067)                               | 1·049 (1·046, 1·052)                               | 1·049 (1·046, 1·052)              |
| Substance-induced                 | 1·026 (1·020, 1·032)                                          | 1·073 (1·066, 1·081)                               | 1·013 (1·009, 1·018)                               | 1·027 (1·024, 1·030)              |
| Suicide                           | 1·025 (1·020, 1·029)                                          | 1·043 (1·034, 1·052)                               | 1·013 (1·010, 1·016)                               | 1·028 (1·024, 1·032)              |
| Heart disease                     | 1·021 (1·019, 1·023)                                          | 1·021 (1·019, 1·023)                               | 1·021 (1·019, 1·023)                               | 1·021 (1·020, 1·022)              |
| Unintentional injury              | 1·015 (1·011, 1·018)                                          | 1·017 (1·013, 1·020)                               | 1·015 (1·012, 1·019)                               | 1·016 (1·014, 1·018)              |
| Malignant neoplasm                | 1·014 (1·013, 1·016)                                          | 1·014 (1·013, 1·016)                               | 1·014 (1·013, 1·016)                               | 1·014 (1·013, 1·015)              |
| Diabetes                          | 1·013 (1·009, 1·018)                                          | 1·039 (1·031, 1·047)                               | 1·010 (1·007, 1·014)                               | 1·015 (1·012, 1·019)              |
| Cerebrovascular disease           | 1·010 (1·007, 1·013)                                          | 1·005 (0·999, 1·011)                               | 1·011 (1·009, 1·014)                               | 1·012 (1·009, 1·015)              |

<sup>a</sup>Risk Ratio

<sup>b</sup>95% Confidence Interval

Note: includes 1,094 unique counties

Supplementary Table S3. Sensitivity analysis of within-county associations between a one-unit change in county jail incarceration rate (1 per 1,000) and change in county mortality rates for nine common causes of death restricting all models to jail incarceration rate data from 1987-2008

| Cause of death outcomes           | Change in county jail incarceration rate (1 per 1,000)     |                                     |                                    |                                                                                  |                                     |                                    |
|-----------------------------------|------------------------------------------------------------|-------------------------------------|------------------------------------|----------------------------------------------------------------------------------|-------------------------------------|------------------------------------|
|                                   | Final analysis (using all available data)                  |                                     |                                    | Sensitivity analysis (restricted to jail incarceration rate data from 1987-2008) |                                     |                                    |
|                                   | One-year lag<br><i>RR<sup>a</sup> (95% CI<sup>b</sup>)</i> | Five-year lag<br><i>RR (95% CI)</i> | Ten-year lag<br><i>RR (95% CI)</i> | One-year lag<br><i>RR (95% CI)</i>                                               | Five-year lag<br><i>RR (95% CI)</i> | Ten-year lag<br><i>RR (95% CI)</i> |
| Infectious disease                | 1·065 (1·061, 1·070)                                       | 1·038 (1·034, 1·043)                | 1·011 (1·007, 1·015)               | 1·053 (1·047, 1·058)                                                             | 1·034 (1·029, 1·039)                | 1·011 (1·007, 1·015)               |
| Chronic lower respiratory disease | 1·049 (1·045, 1·052)                                       | 1·041 (1·038, 1·045)                | 1·028 (1·024, 1·032)               | 1·038 (1·033, 1·042)                                                             | 1·034 (1·030, 1·039)                | 1·028 (1·024, 1·032)               |
| Substance-induced                 | 1·026 (1·020, 1·032)                                       | 1·020 (1·014, 1·026)                | 1·008 (1·002, 1·014)               | 1·037 (1·030, 1·045)                                                             | 1·019 (1·012, 1·026)                | 1·008 (1·002, 1·014)               |
| Suicide                           | 1·025 (1·020, 1·029)                                       | 1·008 (1·003, 1·012)                | 0·999 (0·995, 1·004)               | 1·027 (1·022, 1·033)                                                             | 1·003 (0·998, 1·009)                | 0·999 (0·995, 1·004)               |
| Heart disease                     | 1·021 (1·019, 1·023)                                       | 1·016 (1·014, 1·018)                | 1·012 (1·010, 1·014)               | 1·017 (1·015, 1·020)                                                             | 1·016 (1·014, 1·018)                | 1·012 (1·010, 1·014)               |
| Unintentional injury              | 1·015 (1·011, 1·018)                                       | 1·012 (1·008, 1·016)                | 1·008 (1·004, 1·012)               | 1·022 (1·019, 1·026)                                                             | 1·016 (1·012, 1·020)                | 1·008 (1·004, 1·012)               |
| Malignant neoplasm                | 1·014 (1·013, 1·016)                                       | 1·008 (1·007, 1·010)                | 1·004 (1·002, 1·006)               | 1·011 (1·010, 1·013)                                                             | 1·007 (1·005, 1·009)                | 1·004 (1·002, 1·006)               |
| Diabetes                          | 1·013 (1·009, 1·018)                                       | 1·001 (0·996, 1·006)                | 0·997 (0·992, 1·002)               | 1·010 (1·004, 1·017)                                                             | 1·001 (0·995, 1·006)                | 0·997 (0·992, 1·002)               |
| Cerebrovascular disease           | 1·010 (1·007, 1·013)                                       | 1·007 (1·003, 1·010)                | 1·005 (1·001, 1·009)               | 1·007 (1·003, 1·011)                                                             | 1·008 (1·003, 1·012)                | 1·005 (1·001, 1·009)               |

<sup>a</sup>Risk Ratio

<sup>b</sup>95% Confidence Interval
